# Supplementary material for: Spatial spread of malaria and economic frontier expansion in the Brazilian Amazon
Source: PLoS One. 2019 Jun 18;14(6):e0217615. doi: 10.1371/journal.pone.0217615 (PMC6581252; doi:10.1371/journal.pone.0217615)
Supplement: S1 Table — (XLSX) [file pone.0217615.s001.xlsx]

## Sheet: Cases
Variables	Year	Central Amazon	South and West Hiléia Settlement	Consolidated Settlement
API	2003	5426.8	4545.78	974.275
	2004	5688.65	5698.05	946.658
	2005	5737.45	9661.92	1281.03
	2006	5028.77	9663.12	940.097
	2007	4119.02	7858.52	530.987
	2008	2503.11	5382.07	509.744
	2009	2302.62	5194.94	930.737
	2010	1950.81	4984.56	1095.04
	2011	1572.43	4490.04	1528.8
	2012	1152.43	4897.1	1408.69
	2013	1001.6	4547.68	219.493
P. falciparum	2003	32875	16294	3888
	2004	33342	27177	3156
	2005	31770	49179	6980
	2006	28956	44626	5095
	2007	22723	31820	2021
	2008	10194	17658	1577
	2009	9558	15655	5189
	2010	10431	15673	4489
	2011	7019	11385	3960
	2012	6144	13293	4657
	2013	4527	15751	604
P. vivax	2003	97125	110386	18967
	2004	102477	118002	20553
	2005	119637	166229	25451
	2006	103498	148180	18944
	2007	92786	159177	11994
	2008	68499	115525	12179
	2009	65499	105574	19083
	2010	64324	105001	29259
	2011	53489	93798	47080
	2012	44687	108212	34869
	2013	30744	97854	5434
